# Supplementary material for: Extended Right Hepatectomy following Clearance of the Left Liver Lobe and Portal Vein Embolization for Curatively Intended Treatment of Extensive Bilobar Colorectal Liver Metastases: A Single-Center Case Series
Source: MDPI journal article supplement (doi:10.3390/curroncol31030085), 2024-02-21
Supplement: s1 [file s1]

## Supplementary Data and Figures

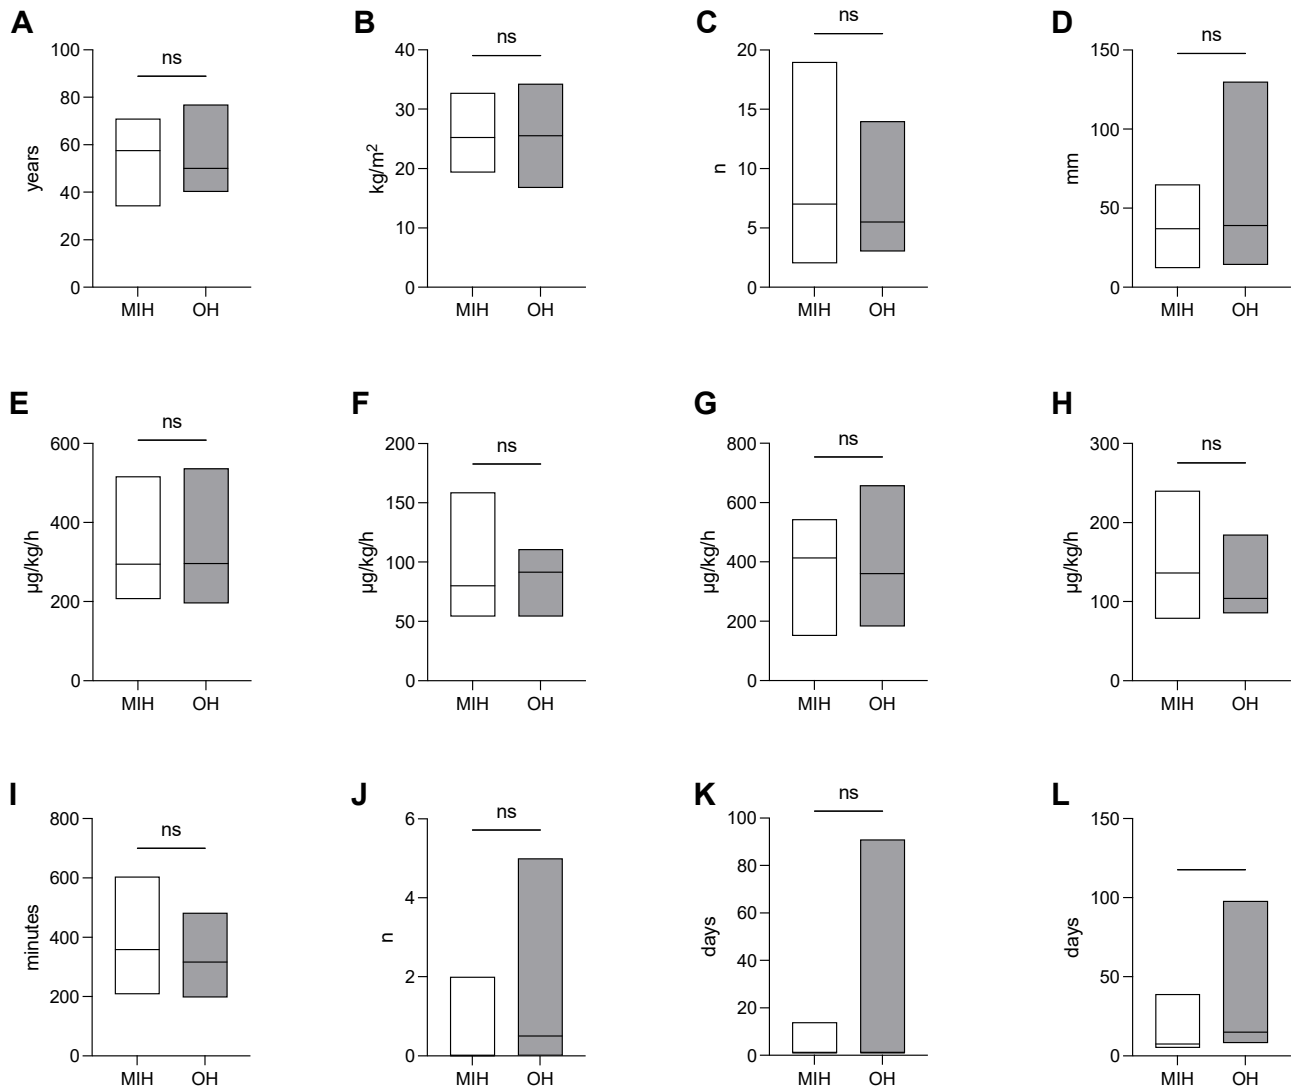

**Supplementary Figure S1.** Boxplots of continuous data showing group comparison between MIH and OH. A) Age at resection, in years; B) BMI, in kg/m<sup>2</sup>; C) number of CRLM after CU; D) size of biggest CRLM, in mm; E) LiMAx before PVE, in μg/kg/h; F) calculated LiMAx of FLR before PVE, in μg/kg/h; G) LiMAx after PVE, in μg/kg/h; H) calculated LiMAx of FLR after PVE, in μg/kg/h; I) duration of surgery, in minutes; J) number of intraoperative RBC units; K) length of ICU stay, in days; L) length of hospital stay, in days. Boxes showing minimum to maximum, line at median. MIH, minimally invasive hepatectomy; OH, open hepatectomy; BMI, body-mass index; CRLM, colorectal liver metastases; CU, clear-up; PVE, portal vein embolization; FLR, future liver remnant; RBC, red blood cells; ICU, intensive care unit; NS, not significant; \*\*,  $p < 0.010$ .

**Supplementary Table S1.** Univariate and multivariate analysis of factors associated with overall and disease-free survival in 26 patients who underwent TSH for extended CRLM.

| Predictor of survival | n (%)   | Overall survival |     |             |
|-----------------------|---------|------------------|-----|-------------|
|                       |         | UV               | MV+ |             |
|                       |         | P                | P   | HR (95% CI) |
| Male sex              | 14 (54) | 0.343            |     |             |

|                                               |        |              |    |   |
|-----------------------------------------------|--------|--------------|----|---|
| Age >65 years                                 | 5 (19) | <b>0.021</b> | NS | - |
| BMI >30 kg/m <sup>2</sup>                     | 5 (19) | 0.665        |    |   |
| ASA ≥III                                      | 14     | 0.394        |    |   |
|                                               | (54)   |              |    |   |
| Synchronous CRLM                              | 23     | -            |    |   |
|                                               | (89)   |              |    |   |
| Diabetes                                      | 1 (4)  | -            |    |   |
| Hypertension                                  | 9 (35) | 0.141        |    |   |
| Pulmonary disease                             | 4 (15) | 0.606        |    |   |
| Desmet-Score ≥3                               | 1 (5)  | 0.803        |    |   |
| Alcohol abuse                                 | 1 (4)  | 0.814        |    |   |
| Nicotine abuse                                | 3 (12) | 0.732        |    |   |
| Number of CRLM ≥6                             | 14     | 0.343        |    |   |
|                                               | (54)   |              |    |   |
| Size of biggest CRLM ≥37 mm                   | 13     | 0.292        |    |   |
|                                               | (50)   |              |    |   |
| RAS mutation                                  | 8 (33) | 0.121        |    |   |
| Calculated FLR-LiMAx post-PVE ≤100<br>μg/kg/h | 6 (23) | <b>0.094</b> | NS | - |
| MIH                                           | 12     | 0.292        |    |   |
|                                               | (46)   |              |    |   |
| Duration of surgery ≥334 minutes              | 13     | 0.394        |    |   |
|                                               | (50)   |              |    |   |
| Number of RBC units ≥1                        | 9 (35) | 0.445        |    |   |
| Length of ICU stay >1 day                     | 10     | 0.190        |    |   |
|                                               | (39)   |              |    |   |
| Length of hospital stay ≥12 days              | 13     | 0.343        |    |   |
|                                               | (50)   |              |    |   |
| SSI                                           | 7 (27) | 0.550        |    |   |
| Abscess                                       | 8 (31) | 0.141        |    |   |
| PHH, all grades                               | 3 (12) | 0.814        |    |   |
| Biliary leakage, all grades                   | 7 (27) | <b>0.094</b> | NS | - |
| PHLF, all grades                              | 3 (12) | 0.732        |    |   |
| Postoperative dialysis                        | 1 (4)  | 0.814        |    |   |
| Revision surgery needed                       | 6 (23) | 0.606        |    |   |
| Readmission to ICU                            | 4 (15) | 0.732        |    |   |
| Postoperative morbidity                       | 17     | 0.445        |    |   |
|                                               | (65)   |              |    |   |
| Postoperative major morbidity                 | 14     | 0.343        |    |   |
|                                               | (54)   |              |    |   |
| Postoperative chemotherapy                    | 11     | 0.503        |    |   |
|                                               | (42)   |              |    |   |

† Cox regression multivariate analysis included all variables with p < 0.100 in univariate analysis. UV, univariate analysis; MV, multivariate analysis; BMI, body-mass index; ASA, American Society of Anesthesiology; CRLM, colorectal liver metastases; RAS, Rat sarcoma viral oncogene; FLR, future liver remnant; PVE, portal vein embolization; MIH, minimally invasive hepatectomy; RBC, red blood cell; SSI, surgical site infection; PHH, post-hepatectomy hemorrhage; PHLF, post hepatectomy liver failure; ICU, intensive care unit; HR, hazard ratio; CI, confidence interval; NS, not significant

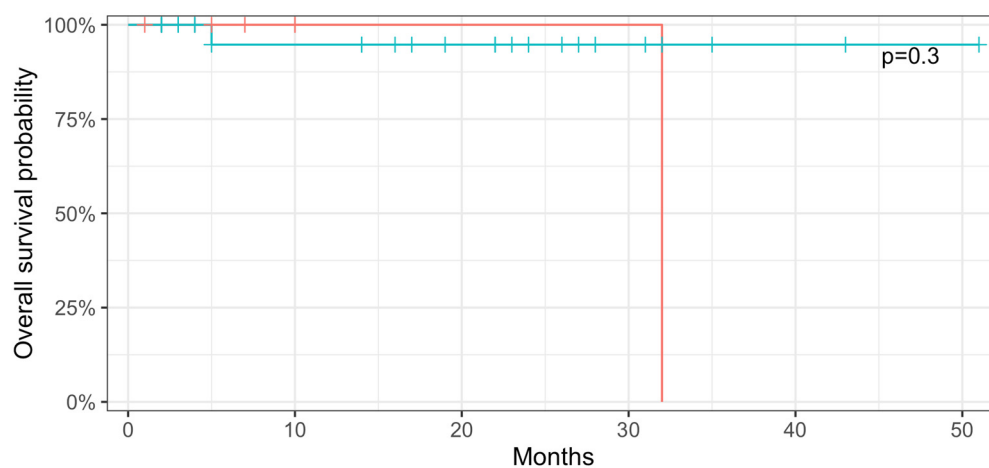

|         |                                                      |    |    |   |   |   |
|---------|------------------------------------------------------|----|----|---|---|---|
|         | <div> <div>+</div> Dropout <div>+ +</div> ERH </div> |    |    |   |   |   |
| At Risk |                                                      |    |    |   |   |   |
| Dropout | 9                                                    | 3  | 1  | 1 | 0 | 0 |
| ERH     | 26                                                   | 17 | 12 | 5 | 2 | 1 |
| Events  |                                                      |    |    |   |   |   |
| Dropout | 0                                                    | 0  | 0  | 0 | 1 | 1 |
| ERH     | 0                                                    | 1  | 1  | 1 | 1 | 1 |

**Supplementary Figure S2.** Overall survival (OS) of all 35 patients who were eligible for this study, and who underwent clear-up (CU) of the left liver lobe followed by embolization of the right portal vein (PVE). Afterwards, nine patients (26%) dropped out due to disease progression, insufficient hypertrophy of the future liver remnant (FLR) after PVE, or withdrawal of consent for surgery, and were recommended for systemic treatment. In this survival analysis, OS between patients who did not proceed to ERH after CU (“Dropout”) were compared to those who underwent ERH. OS was calculated from the day of CU until the day of death or last follow-up. One-year OS rates were 100% and 95% in the Dropout and ERH groups, respectively ( $p = 0.3$ ).

**Supplementary Table S2.** Indications for revision surgery, which was necessary in six cases (23%).

| Indications for revision surgery                            |
|-------------------------------------------------------------|
| Placement of drainages for necrotic pancreatitis            |
| Stopping bleeding and removal of hematoma                   |
| Debridement for wound healing disturbance                   |
| Removal of pleural empyema because of bilio-pleural fistula |
| Small bowel perforation                                     |
| Fascial dehiscence                                          |
